# Supplementary material for: Functional analysis of the rice vacuolar zinc transporter OsMTP1
Source: PubMed Central journal article supplement — J Exp Bot. 2013 Jun 27;64(10):2871–83. doi: 10.1093/jxb/ert136 (PMC3697945; doi:10.1093/jxb/ert136), 2013-06-27
Supplement: supp_ert136_97949_Supplementary_material.pdf [file supp_ert136_97949_Supplementary_material.pdf]

## Supplementary material

**Table S1:** List of primers used for creating *OsMTP1* (NS) site-directed mutations.

| Name           | Sequence                                    |
|----------------|---------------------------------------------|
| OsMTP1 H90D_F  | CTTGACTGATGCAGCCGATCTCCTTTCGGATGT           |
| OsMTP1 H90D_R  | ACATCCGAAAGGAGATCGGCTGCATCAGTCAAG           |
| OsMTP1 G127S_F | GGGTTTTTCCGTATAGAAATTCTTAGTGCCCTGGTTTC      |
| OsMTP1 G127S_R | GAAACCAGGGCACTAAGAATTTCTATACGGAAAAACCC      |
| OsMTP1 L82S_F  | GGAGGTATCAAAGCAAACAGTTCGGCAATCTTGACTGATG    |
| OsMTP1 L82S_R  | CATCAGTCAAGATTGCCGAAGTGTGCTTTGATACCTCC      |
| OsMTP1 L82F_F  | TTGGAGGTATCAAAGCAAACAGTTCGGCAATCTTGACTG     |
| OsMTP1 L82F_R  | CAGTCAAGATTGCGAAACTGTTTGCTTTGATACCTCCAA     |
| OsMTP1 E145G_F | CTTGCTGGTATTCTTGTCTATGGAGCTATTGTAAGGCTCATTA |
| OsMTP1 E145G_R | TAATGAGCCTTACAATAGCTCCATAGACAAGAATACCAGCAAG |
| OsMTP1 L317A_F | TATTGATCTCATCTGCACCGCCATCTTCTCCGTGATCGTA    |
| OsMTP1 L317A_R | TACGATCACGGAGAAGATGGCGGTGCAGATGAGATCAATA    |

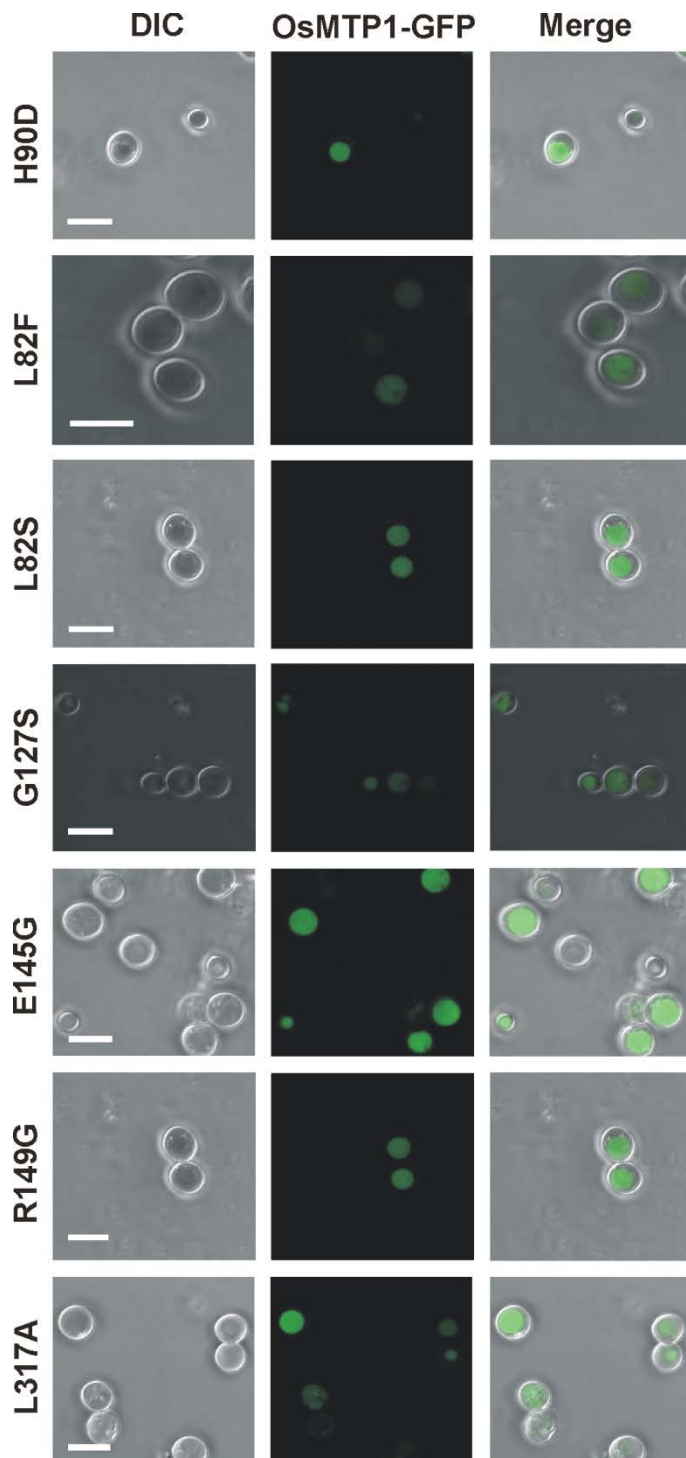

**Figure S1:** OsMTP1 site-directed mutations (H90D, L82F, L82S, G127S, E145G, R149 and L317A) with C-terminal GFP tagging were analyzed for subcellular localisation in *zrc1 cot1* yeast cells as shown via confocal microscopy. Scale bar 5  $\mu$ m.
